# Supplementary material for: Comparison of fingolimod and dimethyl fumarate in the treatment of multiple sclerosis: Two-year experience
Source: PubMed Central journal article supplement — Mult Scler J Exp Transl Clin. 2017 Aug 17;3(3):2055217317725102. doi: 10.1177/2055217317725102 (PMC5564884; doi:10.1177/2055217317725102), 2017-08-17
Supplement: supplementary_material.pdf [file supplementary_material.pdf]

## Supplemental Appendix

**Figure S1.** Density plot of propensity scores (propensity of DMF) demonstrating overlap of propensity scores between DMF and FTY achieved through 2:1 matching with replacement and ATT doubly robust weighting. FTY: fingolimod, DMF: dimethyl fumarate.

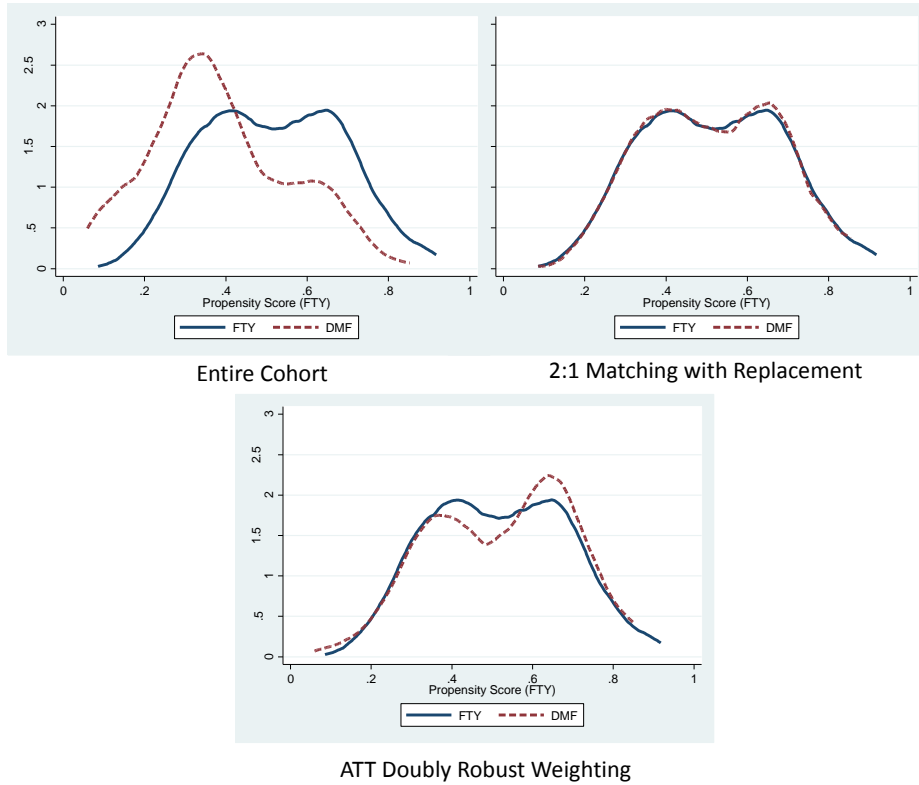

**Figure S2.** Cohen's D values for effect sizes comparing baseline covariates between FTY and DMF for unadjusted, 1:2 propensity score matching and ATT doubly robust weighting. FTY: fingolimod, DMF: dimethyl fumarate.

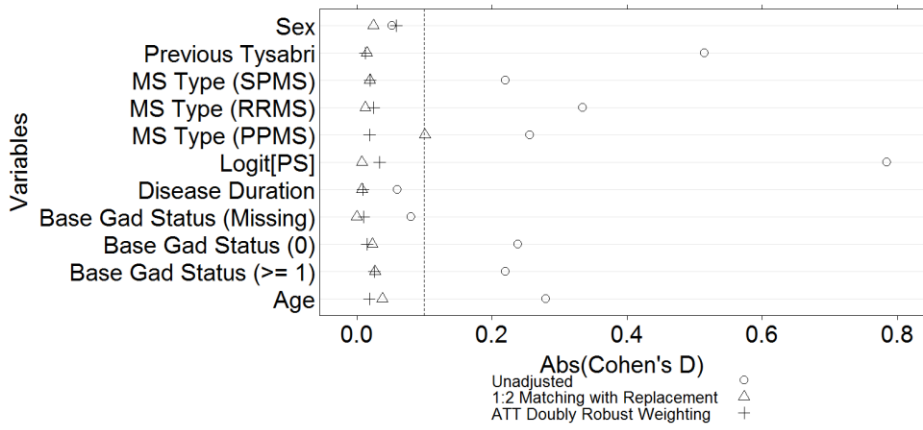

Relapsing-Remitting Multiple Sclerosis Only Cohort

**Table S1.** Baseline characteristics of RRMS\* only

|                                                           | Fingolimod<br>(N=271) |         | Dimethyl fumarate<br>(N=265) |         | P-value |
|-----------------------------------------------------------|-----------------------|---------|------------------------------|---------|---------|
|                                                           | N or<br>Mean          | % or SD | N or<br>Mean                 | % or SD |         |
| <b>Disease Duration (Years, SD)</b>                       | 10.4                  | 6.3     | 9.9                          | 6.6     | 0.101   |
| <b>Age (Years, SD)</b>                                    | 41.5                  | 11.2    | 43.5                         | 12.0    | 0.046   |
| <b>Gender - Female</b>                                    | 178                   | 73.0%   | 192                          | 72.5%   | 0.900   |
| <b>Previous DMT**</b>                                     |                       |         |                              |         | <0.001  |
| Interferons                                               | 35                    | 14.3%   | 39                           | 14.7%   |         |
| Glatiramer acetate                                        | 46                    | 18.9%   | 91                           | 34.3%   |         |
| Natalizumab                                               | 97                    | 39.8%   | 48                           | 18.1%   |         |
| Rituximab                                                 | 1                     | 0.4%    | 5                            | 1.9%    |         |
| Fingolimod                                                | 1                     | 0.4%    | 0                            | 0.0%    |         |
| Dimethyl fumarate                                         | 0                     | 0.0%    | 17                           | 6.4%    |         |
| None                                                      | 61                    | 25.0%   | 60                           | 22.6%   |         |
| Other                                                     | 3                     | 1.2%    | 5                            | 1.9%    |         |
| <b>Mean time between Previous DMT and study drug (SD)</b> | 1.05<br>(N=183)       | 1.22    | 0.76<br>(N=205)              | 1.31    | <0.001  |
| <b>Baseline MRI Available for Review</b>                  |                       |         |                              |         | 0.004   |
| Available                                                 | 211                   | 86.5%   | 249                          | 94.0%   |         |
| Unavailable                                               | 33                    | 13.5%   | 16                           | 6.0%    |         |
| <b>Contrast Enhancement on Baseline MRI</b>               | 53<br>(N=208)         | 25.5%   | 37<br>(N=233)                | 15.9%   | 0.013   |
| <b>Disease Burden on Baseline MRI</b>                     |                       |         |                              |         | <0.001  |
| Mild                                                      | 92                    | 37.7%   | 140                          | 52.8%   |         |
| Moderate                                                  | 70                    | 28.7%   | 71                           | 26.8%   |         |
| Severe                                                    | 37                    | 15.2%   | 16                           | 6.0%    |         |
| Missing                                                   | 45                    | 18.4%   | 38                           | 14.3%   |         |

\* relapsing-remitting multiple sclerosis

\*\* Within 6 months prior to starting study drug

**Table S2.** Unadjusted discontinuation outcomes for RRMS\* only

|                                                 | Fingolimod<br>(N=271) |         | Dimethyl fumarate<br>(N=265) |         | P-value |
|-------------------------------------------------|-----------------------|---------|------------------------------|---------|---------|
|                                                 | N or Mean             | % or SD | N or Mean                    | % or SD |         |
| <b>Discontinued drug ≤24 months</b>             | 79                    | 32.4%   | 121                          | 45.7%   | 0.002   |
| Disease activity**                              | 21                    | 8.6%    | 25                           | 9.4%    | 0.745   |
| Adverse events                                  | 41                    | 16.8%   | 62                           | 23.4%   | 0.064   |
| Insurance                                       | 1                     | 0.4%    | 3                            | 1.1%    | 0.625   |
| Loss to follow up                               | 13                    | 5.3%    | 22                           | 8.3%    | 0.221   |
| Other                                           | 3                     | 1.2%    | 9                            | 3.4%    | 0.145   |
| <b>Mean time to discontinuation (Months)***</b> | 10.6                  | 7.0     | 10.4                         | 7.4     | 0.654   |

\*relapsing-remitting multiple sclerosis

\*\*includes discontinuation of drug due to clinical relapse, MRI activity or disease progression

\*\*\*for those who discontinue

**Table S3.** Unadjusted efficacy outcomes for RRMS\* only

|                                                                   | Fingolimod<br>(N=271) |         | Dimethyl fumarate<br>(N=265) |         | P-value |
|-------------------------------------------------------------------|-----------------------|---------|------------------------------|---------|---------|
|                                                                   | N or Mean             | % or SD | N or Mean                    | % or SD |         |
| <b>Patients with a relapse during first 2 years of study drug</b> | 23                    | 9.4%    | 38                           | 14.3%   | 0.088   |
| <b>MRI Available while on drug in first 2 years</b>               | 195                   | 79.9%   | 207                          | 78.1%   | 0.618   |
| Mean number of available MRIs                                     | 1.66                  | 0.69    | 1.64                         | 0.66    | 0.823   |
| Patients with Contrast enhancement                                | 25                    | 12.8%   | 23                           | 11.1%   | 0.597   |
| Patients with New T2 lesions                                      | 70                    | 35.9%   | 70                           | 33.8%   | 0.662   |
| <b>Composite Efficacy Measure*</b>                                | 87                    | 35.7%   | 98                           | 37.0%   | 0.756   |

\*relapsing-remitting multiple sclerosis

\*\*Patients who had a clinical relapse, contrast enhancement or a new T2 lesion on follow-up MRI

**Table S4.** Unadjusted & adjusted odds ratios for discontinuation for any reason at ≤24 months, discontinuation due to adverse events only and disease activity (DMF versus FTY), RRMS patients

|                                                                                 | N                   | Discontinuation             |         |                             |         | Efficacy                    |         |
|---------------------------------------------------------------------------------|---------------------|-----------------------------|---------|-----------------------------|---------|-----------------------------|---------|
|                                                                                 |                     | Due to Any Reason           |         | Due to Adverse Events       |         | Composite Measure**         |         |
|                                                                                 |                     | Odds Ratio<br>(95% CI)      | p-value | Odds Ratio<br>(95% CI)      | p-value | Odds Ratio<br>(95% CI)      | p-value |
| <b>Simple Logistic Regression</b>                                               | 509                 | <b>1.76</b><br>(1.22, 2.52) | 0.002   | <b>1.52</b><br>(0.97, 2.35) | 0.066   | <b>1.06</b><br>(0.74, 1.52) | 0.756   |
| <b>Adjusted Logistic Regression*</b>                                            | 509                 | <b>2.01</b><br>(1.36, 2.97) | <0.001  | <b>1.51</b><br>(0.95, 2.41) | 0.079   | <b>1.10</b><br>(0.74, 1.63) | 0.628   |
| <b>Propensity Matching with 1:1 greedy matching without replacement*</b>        | 488                 | <b>1.86</b><br>(1.29, 2.69) | 0.001   | <b>1.54</b><br>(0.99, 2.41) | 0.057   | <b>1.05</b><br>(0.73, 1.53) | 0.778   |
| <b>Propensity Matching with 1:2 nearest neighbor matching with replacement*</b> | 732<br>(431 unique) | <b>1.79</b><br>(1.14, 2.80) | 0.011   | <b>1.63</b><br>(0.96, 2.78) | 0.072   | <b>1.13</b><br>(0.72, 1.78) | 0.597   |
| <b>ATT Doubly Robust Weighting Estimator*</b>                                   | 509                 | <b>1.86</b><br>(1.25, 2.77) | 0.002   | <b>1.43</b><br>(0.89, 2.29) | 0.145   | <b>1.17</b><br>(0.80, 1.72) | 0.424   |

\*controlling for age, disease duration, previous natalizumab use, gender, and contrast enhancement on baseline MRI

\*\*includes clinical relapse, new T2 lesion on follow-up MRI, or contrast enhancement on follow-up MRI regardless of the event leading to discontinuation of drug

*Patients who initiated fingolimod in first half versus second half of observation period*

**Table S5.** Unadjusted discontinuation outcomes for fingolimod patients who began before and on/after April 1<sup>st</sup>, 2012

|                                                | Before April 1 <sup>st</sup> , 2012<br>(N=181) |         | On/After April 1 <sup>st</sup> ,<br>2012<br>(N=90) |         | P-value |
|------------------------------------------------|------------------------------------------------|---------|----------------------------------------------------|---------|---------|
|                                                | N or Mean                                      | % or SD | N or Mean                                          | % or SD |         |
| <b>Discontinued drug ≤24 months</b>            | 57                                             | 31.5%   | 36                                                 | 40.0%   | 0.164   |
| Disease activity*                              | 17                                             | 9.4%    | 10                                                 | 11.1%   | 0.656   |
| Adverse events                                 | 28                                             | 15.5%   | 18                                                 | 20.0%   | 0.349   |
| Insurance                                      | 1                                              | 0.6%    | 1                                                  | 1.1%    | 0.613   |
| Loss to follow up                              | 9                                              | 5.0%    | 6                                                  | 6.7%    | 0.566   |
| Other                                          | 2                                              | 1.1%    | 1                                                  | 1.1%    | 0.996   |
| <b>Mean time to discontinuation (Months)**</b> | 12.1                                           | 7.1     | 7.5                                                | 6.2     | 0.003   |

\*includes discontinuation of drug due to clinical relapse, MRI activity or disease progression

\*\*for those who discontinue

Patients who initiated dimethyl fumarate in first half versus second half of observation period

**Table S6.** Unadjusted discontinuation outcomes for dimethyl fumarate patients before and on/after July 1<sup>st</sup>, 2013

Formatted Table

|                                                | Before July 1 <sup>st</sup> , 2013<br>(N=192) |         | On/after July 1 <sup>st</sup> , 2013<br>(N=150) |         | P-value |
|------------------------------------------------|-----------------------------------------------|---------|-------------------------------------------------|---------|---------|
|                                                | N or Mean                                     | % or SD | N or Mean                                       | % or SD |         |
| <b>Discontinued drug ≤24 months</b>            | 91                                            | 47.4%   | 70                                              | 46.7%   | 0.893   |
| Disease activity*                              | 25                                            | 13.0%   | 13                                              | 8.7%    | 0.204   |
| Adverse events                                 | 46                                            | 24.0%   | 36                                              | 24.0%   | 0.993   |
| Insurance                                      | 2                                             | 1.0%    | 2                                               | 1.3%    | 0.803   |
| Loss to follow up                              | 13                                            | 6.8%    | 14                                              | 9.3%    | 0.383   |
| Other                                          | 5                                             | 2.6%    | 5                                               | 3.3%    | 0.691   |
| <b>Mean time to discontinuation (Months)**</b> | 11.0                                          | 7.1     | 8.6                                             | 7.1     | 0.025   |

\*includes discontinuation of drug due to clinical relapse, MRI activity or disease progression

\*\*for those who discontinue

**Table S7.** Cohen's D values for FTY vs DMF before and after propensity matching

|                           | Unadjusted | 1:1 Greedy Matching | 1:2 Matching with Replacement | 1:1 Matching with Replacement | ATT Doubly Robust Weighting |
|---------------------------|------------|---------------------|-------------------------------|-------------------------------|-----------------------------|
| Age                       | 0.280      | 0.089               | 0.038                         | 0.048                         | 0.018                       |
| Disease Duration          | 0.060      | 0.094               | 0.008                         | 0.075                         | 0.009                       |
| MS Type (RRMS)            | 0.339      | 0.038               | 0.012                         | 0.078                         | 0.025                       |
| MS Type (SPMS)            | 0.221      | 0.013               | 0.020                         | 0.041                         | 0.020                       |
| MS Type (PPMS)            | 0.258      | 0.070               | 0.100                         | 0.116                         | 0.019                       |
| Previous Tysabri          | 0.531      | 0.417               | 0.015                         | 0.015                         | 0.012                       |
| Sex                       | 0.052      | 0.017               | 0.024                         | 0.067                         | 0.058                       |
| Base Gad Status (0)       | 0.240      | 0.151               | 0.023                         | 0.015                         | 0.015                       |
| Base Gad Status (≥ 1)     | 0.221      | 0.143               | 0.027                         | 0.018                         | 0.026                       |
| Base Gad Status (Missing) | 0.080      | 0.043               | 0.000                         | 0.000                         | 0.010                       |
